# Supplementary material for: Protein Discovery: Combined Transcriptomic and Proteomic Analyses of Venom from the Endoparasitoid Cotesia chilonis (Hymenoptera: Braconidae)
Source: MDPI journal article supplement (doi:10.3390/toxins9040135), 2017-04-12
Supplement: s1 [file s1]

Supplementary table 6. Primers used for qPCR analysis of expression levels of putative venom genes in *C. chilonis*.

| Primer name         | Forward primer (5'-3') | Reverse primer (5'-3') |
|---------------------|------------------------|------------------------|
| Serine protease     | CGTCGATTTACTTGGCTGGG   | TGGTGGGATTTTGCCACAAG   |
| TLP                 | GACGATTCATTCAGCGGCTT   | CGATGACATGTCCCAATTCGT  |
| Phospholipase A1    | TGGGTGCTCATATTCCTGCA   | ACAAGGTCAAGTATCCGGCA   |
| NAG                 | AACTCTTCGTCCATTCCCGT   | TAAACAGGAGCGTCGGTGAT   |
| FKBP14              | TGTCACCCAATCTCTCGCTT   | CGTACCGGTGTAATGCATGG   |
| SOD3                | CACTGGTACTCGTTTCTGCG   | ATTGAAGTGTTCCGCCAGTGC  |
| Serpin              | ACGCGAAAATCTTGTTGGCT   | CGTCATTTTCATCGCCGGAT   |
| IEP-2<br>(Cc-Ven20) | GTGTCATTGGTTCCAGCTGG   | CAATGACTGCCTAAACCCGG   |
| IEP-2<br>(Cc-Ven21) | CAACCCGGTTATGTTTCAGCA  | CATCGAAGCTCTTGACGCAT   |
| Calreticulin        | AAAGGACATGCACGGAGAGA   | AGTCGGCTTCAAGTTCTCCA   |
| CRFBP               | GAACCTACAGTCTGCGGAGT   | GTGGTCATTCTCTGGTGGA    |
